# Supplementary material
Source: Springer Nature journal article supplement (https://www.springermedizin.de/resource/supplementary/12943_2009_648_MOESM4_ESM.pdf/9554480)

A

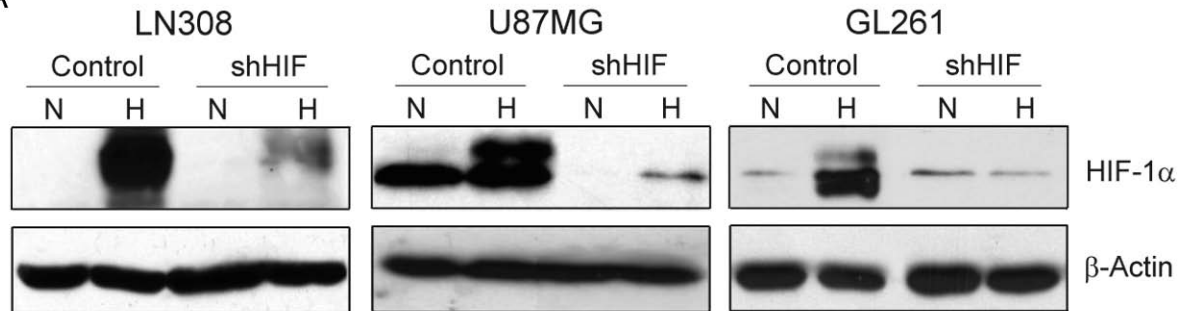

B

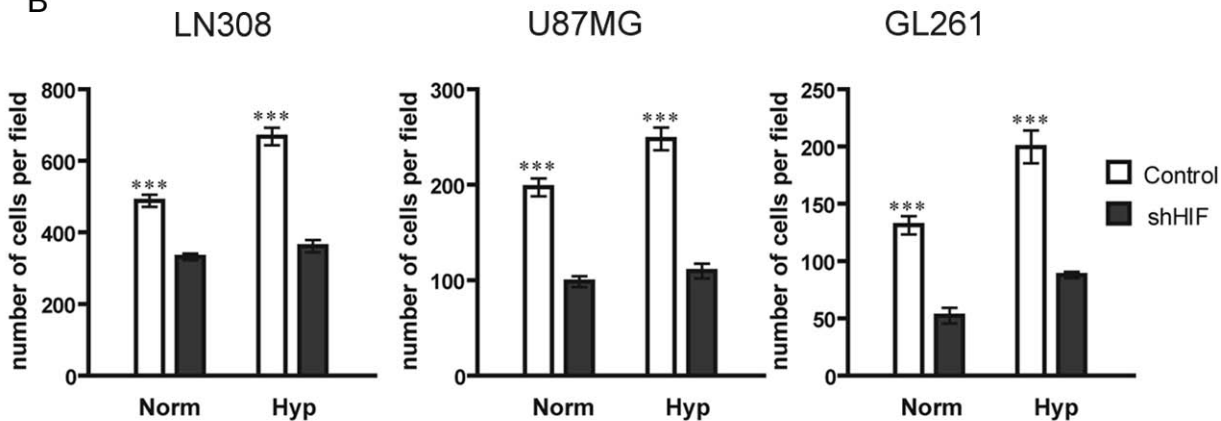

Supplement: MOESM4 [file 9554480]
